# Supplementary material
Source: publisher figshare collection journal article supplement (https://aacr.figshare.com/ndownloader/files/39879876)
Supplement: Supplementary file 1 [file 39879876]

## Sheet: Feuil1
Table S5: 283 DEGs in both mAGCTs and the KD condition
FC>1.5 in either direction and adjusted p-value <0.05
Gene name	Ensembl gene id	siRNA experiment	mAGCTs	Log2FC_siRNA(siFOXL2 vs siScr)	Log2FC(mice AGCT vs WT)	Log2FC(mice hyperplasia vs WT)
Maf	ENSMUSG00000055435	up	down	1.30475	-1.07079	0.560775
Ptprb	ENSMUSG00000020154	up	down	1.1596	-1.66689	-0.00456071
Nrp1	ENSMUSG00000025810	up	down	1.21484	-1.42318	-0.357338
Mmrn1	ENSMUSG00000054641	up	down	1.91137	-3.03976	-0.427641
Timp1	ENSMUSG00000001131	up	down	0.969548	-2.88432	0.574034
Arap3	ENSMUSG00000024451	up	down	0.984792	-0.928748	-0.17232
Cemip	ENSMUSG00000052353	up	down	1.14063	-4.74496	0.0669966
Hmgcs1	ENSMUSG00000093930	up	down	0.850194	-2.06514	-0.019014
Ppm1h	ENSMUSG00000034613	up	down	0.659707	-1.25979	-0.277981
C3ar1	ENSMUSG00000040552	up	down	1.37558	-2.21566	-0.279025
Adgrg3	ENSMUSG00000060470	up	down	1.50902	-3.58854	-0.21151
Klf5	ENSMUSG00000005148	up	down	1.17227	-2.62148	-0.801489
Npl	ENSMUSG00000042684	up	down	1.15525	-1.88546	-0.226773
Meg3	ENSMUSG00000021268	up	down	0.785849	-2.26967	-0.381855
Acan	ENSMUSG00000030607	up	down	1.62133	-4.61736	-1.12322
Tmem72	ENSMUSG00000048108	up	down	1.04531	-3.70118	-1.04125
4933427D06Rik	ENSMUSG00000055403	up	down	1.01457	-7.07233	-2.64303
Itgax	ENSMUSG00000030789	up	down	1.27729	-2.59276	0.990796
Ngf	ENSMUSG00000027859	up	down	1.49833	-2.78817	-0.101184
Gm2a	ENSMUSG00000000594	up	down	0.724793	-1.92419	-0.328685
Hhex	ENSMUSG00000024986	up	down	0.992666	-2.30278	-0.46598
Smarca1	ENSMUSG00000031099	up	down	1.1085	-1.83612	-0.405324
4930486L24Rik	ENSMUSG00000050345	up	down	1.53688	-3.48052	-0.624534
Gatm	ENSMUSG00000027199	up	down	1.81592	-1.30748	-0.137163
Tubb3	ENSMUSG00000062380	up	down	0.953175	-2.19471	-0.133026
Rgs16	ENSMUSG00000026475	up	down	2.0164	-1.51331	-0.19955
Gabrb1	ENSMUSG00000029212	up	down	1.06935	-2.55587	-1.0007
A330023F24Rik	ENSMUSG00000096929	up	down	0.772582	-3.49328	-0.470196
P2ry6	ENSMUSG00000048779	up	down	0.971955	-1.25711	-0.275896
Cfb	ENSMUSG00000090231	up	down	1.12695	-3.09386	-0.817536
Wipf3	ENSMUSG00000086040	up	down	1.26574	-2.97332	-1.88651
Sqle	ENSMUSG00000022351	up	down	0.656818	-2.31578	-0.14314
Slco2a1	ENSMUSG00000032548	up	down	1.19953	-1.57381	-0.215133
Pstpip1	ENSMUSG00000032322	up	down	1.13868	-1.74191	0.119475
Itgam	ENSMUSG00000030786	up	down	1.62272	-1.63877	-0.320906
Sh3bgr	ENSMUSG00000040666	up	down	1.02065	-1.96275	-0.167297
Ifit1bl2	ENSMUSG00000067297	up	down	1.30407	-2.83538	-1.75449
Cpeb1	ENSMUSG00000025586	up	down	0.967159	-2.67758	-0.344633
Cyp11a1	ENSMUSG00000032323	up	down	0.683546	-3.23657	-0.607768
Plekhg4	ENSMUSG00000014782	up	down	1.03126	-7.57659	0.167646
Akap12	ENSMUSG00000038587	up	down	1.76425	-1.67509	0.124071
Adssl1	ENSMUSG00000011148	up	down	0.688601	-3.91157	-2.07336
Rhpn2	ENSMUSG00000030494	up	down	0.779508	-2.18051	-1.34369
Adamtsl1	ENSMUSG00000066113	up	down	1.39607	-1.63965	0.30878
Ly6a	ENSMUSG00000075602	up	down	1.51484	-2.50226	-0.502339
Pde5a	ENSMUSG00000053965	up	down	0.822989	-1.65257	-0.525105
Dusp14	ENSMUSG00000018648	up	down	1.37342	-2.26163	-1.57627
Cthrc1	ENSMUSG00000054196	up	down	1.79938	-3.3102	-0.557103
Adh7	ENSMUSG00000055301	up	down	1.75596	-5.08706	0.868082
Naip2	ENSMUSG00000078945	up	down	1.48321	-1.38212	0.306368
Inpp5j	ENSMUSG00000034570	up	down	1.04676	-2.93623	-1.01632
Cmbl	ENSMUSG00000022235	up	down	0.626319	-1.81219	-0.842815
Fbxw21	ENSMUSG00000047237	up	down	1.36681	-8.50986	-2.8957
Islr2	ENSMUSG00000051243	up	down	1.01068	-2.95854	-1.40636
Gbp4	ENSMUSG00000079363	up	down	1.16687	-2.20112	0.432252
Tspan15	ENSMUSG00000037031	up	down	0.800653	-1.80123	-0.958878
Cyp51	ENSMUSG00000001467	up	down	0.789957	-2.13816	0.472457
Bsn	ENSMUSG00000032589	up	down	0.641977	-2.35462	-0.462323
Fgf1	ENSMUSG00000036585	up	down	1.40321	-2.79511	-1.13045
Maoa	ENSMUSG00000025037	up	down	0.654204	-1.01225	0.0602746
Adh1	ENSMUSG00000074207	up	down	1.51052	-2.96342	-0.107328
Laptm5	ENSMUSG00000028581	up	down	1.04606	-1.30764	0.35049
Adamts14	ENSMUSG00000059901	up	down	1.84684	-2.10237	-1.32095
Spns2	ENSMUSG00000040447	up	down	1.45745	-2.84856	-0.778803
Ly9	ENSMUSG00000004707	up	down	1.66083	-2.59075	0.513477
Me1	ENSMUSG00000032418	up	down	1.29462	-1.95201	0.0418836
Ccdc69	ENSMUSG00000049588	up	down	0.904736	-1.45604	-0.634213
Usp43	ENSMUSG00000020905	up	down	0.809164	-1.84175	-0.104705
Flt4	ENSMUSG00000020357	up	down	1.32854	-1.52721	0.041247
Mpeg1	ENSMUSG00000046805	up	down	0.945023	-1.80664	0.294556
Trim61	ENSMUSG00000109718	up	down	2.32832	-9.67797	-2.41654
Abcg4	ENSMUSG00000032131	up	down	1.02907	-2.67002	-0.504323
Adamts15	ENSMUSG00000033453	up	down	1.99185	-2.79188	-0.437902
Scrn1	ENSMUSG00000019124	up	down	1.1885	-3.20603	-0.215144
Cd177	ENSMUSG00000052212	up	down	0.96113	-5.61264	-2.06386
Tmsb4x	ENSMUSG00000049775	up	down	0.660579	-1.22425	-0.260975
Oas1c	ENSMUSG00000001166	up	down	0.592077	-2.46381	-1.748
Fdxr	ENSMUSG00000018861	up	down	0.587991	-1.53083	-0.64498
Sbsn	ENSMUSG00000046056	up	down	0.886181	-2.92693	0.371588
Tmprss6	ENSMUSG00000016942	up	down	1.23873	-3.47402	-1.51933
Stc1	ENSMUSG00000014813	up	down	1.78454	-3.30146	-1.38165
Ccdc141	ENSMUSG00000044033	up	down	0.877235	-2.28697	-0.160239
Nags	ENSMUSG00000048217	up	down	0.805881	-3.58076	-0.34919
AU015836	ENSMUSG00000081044	down	down	-1.75154	-4.44831	-1.09024
Snap91	ENSMUSG00000033419	down	down	-1.53549	-3.31213	-0.894729
Sgk1	ENSMUSG00000019970	down	down	-1.28964	-3.64387	-1.17242
Plp1	ENSMUSG00000031425	down	down	-2.17341	-2.46165	-2.56858
Crabp2	ENSMUSG00000004885	down	down	-1.75342	-5.91317	-3.2803
Pik3r5	ENSMUSG00000020901	down	down	-1.14187	-1.38641	0.571509
Hsd3b1	ENSMUSG00000027871	down	down	-1.06162	-1.52434	-0.442278
Csf2rb	ENSMUSG00000071713	down	down	-1.51752	-1.9267	0.458261
A2m	ENSMUSG00000030111	down	down	-1.01915	-3.68021	0.735315
Ptprz1	ENSMUSG00000068748	down	down	-0.95309	-1.98815	0.195423
Lrrn2	ENSMUSG00000026443	down	down	-1.00794	-3.27277	-0.70007
Ms4a6d	ENSMUSG00000024679	down	down	-2.61511	-2.74695	0.355906
Prlr	ENSMUSG00000005268	down	down	-1.50853	-3.25339	-0.37798
Elavl2	ENSMUSG00000008489	down	down	-2.4915	-2.91028	-1.13741
Lrp8	ENSMUSG00000028613	down	down	-0.70193	-2.93091	-1.2918
Apobec1	ENSMUSG00000040613	down	down	-1.25284	-1.32257	-0.287047
Tmem86a	ENSMUSG00000010307	down	down	-0.65808	-1.397	-0.576341
Hpse	ENSMUSG00000035273	down	down	-1.85076	-1.69517	0.713921
Cadps	ENSMUSG00000054423	down	down	-1.39902	-5.82096	-3.28831
Glipr1	ENSMUSG00000056888	down	down	-0.919329	-2.414	-0.135023
Pfkp	ENSMUSG00000021196	down	down	-0.696648	-1.15438	0.454105
Arg1	ENSMUSG00000019987	down	down	-1.58541	-2.81057	-0.553341
Kif18a	ENSMUSG00000027115	down	down	-1.23237	-1.10957	-0.939014
Pcx	ENSMUSG00000024892	down	down	-1.73856	-2.00911	-0.452691
Acss3	ENSMUSG00000035948	down	down	-1.17317	-2.91196	-0.63153
Blm	ENSMUSG00000030528	down	down	-0.689825	-1.12723	-0.870736
Gpr141	ENSMUSG00000053101	down	down	-1.12747	-6.03912	-0.287068
Sema3g	ENSMUSG00000021904	down	down	-2.06237	-2.89911	-1.3896
Chek1	ENSMUSG00000032113	down	down	-0.743606	-1.20903	-1.22528
Esco2	ENSMUSG00000022034	down	down	-0.712242	-1.38059	-1.343
Tmem178	ENSMUSG00000024245	down	down	-0.86069	-2.14607	-0.28762
Cgref1	ENSMUSG00000029161	down	down	-0.605418	-2.17117	-1.09204
Stk17b	ENSMUSG00000026094	down	down	-0.748669	-1.26346	-0.0878295
Cnga1	ENSMUSG00000067220	down	down	-0.865393	-5.49239	-3.33312
Ahr	ENSMUSG00000019256	down	down	-0.821526	-1.78806	-0.586479
Lhcgr	ENSMUSG00000024107	down	down	-2.58156	-2.51878	-1.00874
Tnfrsf8	ENSMUSG00000028602	down	down	-1.49117	-4.65727	-0.289456
Stmn2	ENSMUSG00000027500	down	down	-1.38634	-4.75002	0.103341
Abcb1b	ENSMUSG00000028970	down	down	-1.43308	-4.94279	-1.13749
Grem1	ENSMUSG00000074934	down	down	-1.40731	-7.04263	-1.10882
Kl	ENSMUSG00000058488	down	down	-1.99142	-4.07559	-1.02319
Cntn3	ENSMUSG00000030075	down	down	-1.95778	-3.18001	-1.21232
Cdc25c	ENSMUSG00000044201	down	down	-0.751384	-1.78582	-1.69199
Pdcd1	ENSMUSG00000026285	down	down	-2.7813	-4.73896	-1.36013
Pde3b	ENSMUSG00000030671	down	down	-2.21069	-1.73225	0.194357
Atp6v0d2	ENSMUSG00000028238	down	down	-2.24792	-5.95718	0.701478
Ldlr	ENSMUSG00000032193	down	down	-0.659283	-2.16399	0.0934924
Slc5a4b	ENSMUSG00000020226	down	down	-0.897047	-5.69717	-2.48625
Pik3c2g	ENSMUSG00000030228	down	down	-1.75705	-7.71481	-1.65167
Spp1	ENSMUSG00000029304	down	down	-2.44429	-4.93378	2.49595
Ddx4	ENSMUSG00000021758	down	down	-1.08634	-6.35365	-1.74347
Il1rl1	ENSMUSG00000026069	down	down	-0.795917	-2.89745	-0.32337
Ctsc	ENSMUSG00000030560	down	down	-0.846108	-1.71661	-0.0595115
Adrb2	ENSMUSG00000045730	down	down	-0.912297	-2.53624	-1.34535
Tmem26	ENSMUSG00000060044	down	down	-1.11001	-3.34536	0.320624
Slc1a5	ENSMUSG00000001918	down	down	-0.840996	-1.58935	-0.145021
Coro2a	ENSMUSG00000028337	down	down	-1.23889	-3.73539	-0.504844
Kcnd2	ENSMUSG00000060882	down	down	-2.509	-2.50051	-0.514516
Olr1	ENSMUSG00000030162	down	down	-1.04211	-5.68877	0.276288
Scn1b	ENSMUSG00000019194	down	down	-0.615979	-1.06164	0.0225152
Aspm	ENSMUSG00000033952	down	down	-0.927006	-1.18143	-1.29478
Dancr	ENSMUSG00000106943	down	down	-0.963762	-1.73446	-0.390619
Aldob	ENSMUSG00000028307	down	down	-1.35695	-4.24356	-2.52451
Plin5	ENSMUSG00000011305	down	down	-1.04234	-4.6312	-0.807291
Slc25a30	ENSMUSG00000022003	down	down	-0.845732	-1.8897	-0.697275
Prrg1	ENSMUSG00000047996	down	down	-1.04099	-1.87485	-0.315672
Abcb7	ENSMUSG00000031333	down	down	-0.689097	-1.11454	-0.209017
Mycl	ENSMUSG00000028654	up	up	0.998541	2.28109	0.522348
Ldhb	ENSMUSG00000030246	up	up	1.08521	1.16706	0.169178
Itga6	ENSMUSG00000027111	up	up	0.881597	1.96377	1.4781
Magi1	ENSMUSG00000045095	up	up	0.922302	1.28281	0.338242
Cpxm1	ENSMUSG00000027408	up	up	0.936161	3.94843	0.262132
Thbd	ENSMUSG00000074743	up	up	0.635238	1.70064	1.31907
Nxnl2	ENSMUSG00000021396	up	up	1.43114	2.05058	1.09305
Sorcs2	ENSMUSG00000029093	up	up	1.53388	1.76392	0.984483
Foxa2	ENSMUSG00000037025	up	up	1.20155	4.54852	3.05557
Sox8	ENSMUSG00000024176	up	up	1.72967	1.64566	1.53877
Tcte2	ENSMUSG00000038347	up	up	0.763833	1.81991	0.396742
Kank4	ENSMUSG00000035407	up	up	1.30482	1.8988	1.15473
Mylk3	ENSMUSG00000031698	up	up	1.40893	3.62479	2.13747
Tcea3	ENSMUSG00000001604	up	up	1.20162	1.6266	0.774342
Kcnh2	ENSMUSG00000038319	up	up	0.871211	1.44742	0.725033
Fgfr4	ENSMUSG00000005320	up	up	0.9301	1.76752	0.951025
Shroom1	ENSMUSG00000018387	up	up	1.203	2.95702	0.345267
Fcer2a	ENSMUSG00000005540	up	up	1.30662	4.94703	2.18307
Rtn4rl1	ENSMUSG00000045287	up	up	0.675527	1.83124	0.497831
Sox9	ENSMUSG00000000567	up	up	2.48799	1.80317	0.472799
Plagl1	ENSMUSG00000019817	up	up	1.20345	1.4343	0.668947
Kctd14	ENSMUSG00000051727	up	up	1.5721	2.33096	1.75945
Ppp2r2c	ENSMUSG00000029120	up	up	0.995305	3.34752	1.59646
Col17a1	ENSMUSG00000025064	up	up	1.4536	2.46134	1.66373
Fjx1	ENSMUSG00000075012	up	up	1.61166	2.06164	0.896291
Cdkn2a	ENSMUSG00000044303	up	up	1.13801	3.10694	0.424499
Erbb4	ENSMUSG00000062209	up	up	0.861573	3.61076	2.39395
Per2	ENSMUSG00000055866	up	up	1.78194	1.94326	0.863392
Crip3	ENSMUSG00000023968	up	up	1.12427	2.02259	0.45705
Fhod3	ENSMUSG00000034295	up	up	1.28003	1.61708	0.845788
Cryab	ENSMUSG00000032060	up	up	1.46159	1.69307	0.448962
Pcsk6	ENSMUSG00000030513	up	up	1.01161	2.55908	1.74302
Eya1	ENSMUSG00000025932	up	up	1.31343	2.58288	1.09366
Cd200	ENSMUSG00000022661	up	up	1.41015	0.780206	0.235129
2700054A10Rik	ENSMUSG00000117042	up	up	1.10172	2.99179	0.703467
Tnni1	ENSMUSG00000026418	up	up	2.45229	4.14603	3.43036
Jam2	ENSMUSG00000053062	up	up	2.01294	1.70632	0.437217
Etnk2	ENSMUSG00000070644	up	up	1.95921	2.54782	1.17129
Tril	ENSMUSG00000043496	up	up	0.947821	1.24307	0.505548
Ces2g	ENSMUSG00000031877	up	up	0.767836	1.54345	0.632917
Cobl	ENSMUSG00000020173	up	up	1.19196	1.23812	0.0265069
Rarres2	ENSMUSG00000009281	up	up	0.656158	1.6413	1.01434
Amhr2	ENSMUSG00000023047	up	up	0.707607	1.60349	0.612552
Mical2	ENSMUSG00000038244	up	up	0.637076	1.77135	0.956858
Ptges	ENSMUSG00000050737	up	up	0.784123	3.65771	1.01739
Slc26a11	ENSMUSG00000039908	up	up	0.799925	1.33555	0.298772
Slc6a14	ENSMUSG00000031089	up	up	1.01365	2.83832	2.04191
Arhgap22	ENSMUSG00000063506	up	up	1.01423	1.99152	1.10773
Grip1	ENSMUSG00000034813	up	up	0.810166	2.18405	1.38204
Daam2	ENSMUSG00000040260	up	up	1.91152	1.94718	0.709361
Tdrp	ENSMUSG00000050052	up	up	1.37813	2.47654	0.646996
Mycn	ENSMUSG00000037169	up	up	0.954391	1.78035	-0.170549
Ivns1abp	ENSMUSG00000023150	up	up	1.05995	1.3092	-0.108473
Cdh23	ENSMUSG00000012819	up	up	0.946386	3.74036	2.12492
Slc9a3	ENSMUSG00000036123	up	up	3.55411	2.20477	-0.0226219
Gprasp2	ENSMUSG00000072966	up	up	1.03981	1.27442	0.503023
Lrrc1	ENSMUSG00000032352	up	up	0.739884	1.03417	0.714634
Rorc	ENSMUSG00000028150	up	up	0.743373	1.81471	0.572899
Scara5	ENSMUSG00000022032	up	up	0.865759	2.70111	1.8397
Srgap1	ENSMUSG00000020121	up	up	0.608487	1.81186	1.01496
Lmo7	ENSMUSG00000033060	up	up	1.79832	1.85452	0.754094
Capn6	ENSMUSG00000067276	up	up	1.07849	2.42473	-0.858233
Tspan18	ENSMUSG00000027217	up	up	0.622267	2.44375	1.5243
Cdh13	ENSMUSG00000031841	up	up	1.71803	3.52326	3.45166
Camsap3	ENSMUSG00000044433	up	up	0.712697	1.30998	0.372732
Bmp3	ENSMUSG00000029335	down	up	-1.30699	2.59088	1.08716
Plxdc2	ENSMUSG00000026748	down	up	-0.895786	1.252	0.848434
Hsd3b6	ENSMUSG00000027869	down	up	-1.26416	2.8352	1.59997
Angptl1	ENSMUSG00000033544	down	up	-1.5136	3.83302	2.13881
Bex4	ENSMUSG00000047844	down	up	-1.75437	1.73656	0.218697
Tmem229b	ENSMUSG00000046157	down	up	-0.591686	1.69887	0.580682
Bcat1	ENSMUSG00000030268	down	up	-0.968918	1.20929	0.304298
Cdc42ep5	ENSMUSG00000063838	down	up	-0.926941	1.71404	0.393279
Rab17	ENSMUSG00000026304	down	up	-1.26792	2.397	1.19318
Papss2	ENSMUSG00000024899	down	up	-2.17348	2.2105	0.462623
Zfp41	ENSMUSG00000047003	down	up	-0.817699	2.13424	0.458979
Mctp1	ENSMUSG00000021596	down	up	-1.7459	1.61469	0.42488
Edil3	ENSMUSG00000034488	down	up	-1.58391	3.03597	2.57114
Coq8a	ENSMUSG00000026489	down	up	-1.02502	2.50125	0.88327
Fam20c	ENSMUSG00000025854	down	up	-1.56971	3.33679	0.753042
Chst8	ENSMUSG00000060402	down	up	-1.81942	2.06018	0.537842
Arhgap28	ENSMUSG00000024043	down	up	-2.32321	1.11083	0.270612
Ly75	ENSMUSG00000026980	down	up	-0.919785	2.29407	1.60942
Pde7b	ENSMUSG00000019990	down	up	-0.925523	1.74913	1.12817
Susd1	ENSMUSG00000038578	down	up	-0.95833	1.82858	0.243623
Derl3	ENSMUSG00000009092	down	up	-1.25016	2.05641	-1.16643
Amigo2	ENSMUSG00000048218	down	up	-0.699397	2.72397	0.981072
Naalad2	ENSMUSG00000043943	down	up	-0.784417	1.59365	0.810312
Rps6ka1	ENSMUSG00000003644	down	up	-0.81612	1.27876	0.304909
Slc25a35	ENSMUSG00000018740	down	up	-1.03057	1.76119	0.270447
Arxes2	ENSMUSG00000048040	down	up	-1.1679	1.99619	0.254792
Gpm6b	ENSMUSG00000031342	down	up	-0.864046	1.52654	1.54179
Epha4	ENSMUSG00000026235	down	up	-1.09917	3.75142	1.17022
Rapgef4	ENSMUSG00000049044	down	up	-1.60764	1.39404	0.380348
Galnt6	ENSMUSG00000037280	down	up	-1.30737	3.32581	2.51731
Sytl3	ENSMUSG00000041831	down	up	-2.36584	3.60674	1.24595
Atp9a	ENSMUSG00000027546	down	up	-0.746853	1.42033	0.534258
Tenm4	ENSMUSG00000048078	down	up	-1.78837	1.70692	0.650996
Plxdc1	ENSMUSG00000017417	down	up	-1.2143	1.69107	0.658059
Uck1	ENSMUSG00000002550	down	up	-1.1759	1.2184	0.283442
Rps6ka2	ENSMUSG00000023809	down	up	-1.3643	1.72576	0.622917
Thbs1	ENSMUSG00000040152	down	up	-0.928187	2.98675	1.31407
Nell1	ENSMUSG00000055409	down	up	-1.8265	5.53576	3.89689
P2ry14	ENSMUSG00000036381	down	up	-3.02693	1.95253	0.885147
Syt7	ENSMUSG00000024743	down	up	-2.57372	2.06846	0.503355
Omd	ENSMUSG00000048368	down	up	-1.49162	1.85266	0.545321
Plcl2	ENSMUSG00000038910	down	up	-0.933943	1.62057	1.00739
Gfpt2	ENSMUSG00000020363	down	up	-1.29275	1.83779	0.486668
Phex	ENSMUSG00000057457	down	up	-1.20099	2.50075	0.467954
Taf4b	ENSMUSG00000054321	down	up	-0.678921	1.26137	0.59449
Kcnip3	ENSMUSG00000079056	down	up	-1.82726	1.55598	0.330796
Trp63	ENSMUSG00000022510	down	up	-2.55905	2.17324	0.452317
Fam110c	ENSMUSG00000036136	down	up	-1.13719	1.91103	1.1275
Cd320	ENSMUSG00000002308	down	up	-0.700536	1.50567	0.140646
Bcan	ENSMUSG00000004892	down	up	-1.00375	2.92865	1.06297
Rbm20	ENSMUSG00000043639	down	up	-0.827387	2.67404	1.10942
Bmpr1b	ENSMUSG00000052430	down	up	-2.21612	1.2604	0.164442
Kif5c	ENSMUSG00000026764	down	up	-1.12191	1.38514	0.664558
Cdca7l	ENSMUSG00000021175	down	up	-0.911762	1.17085	0.300998
Sytl4	ENSMUSG00000031255	down	up	-0.930344	1.46192	-0.208352
Creb3l3	ENSMUSG00000035041	down	up	-2.16184	3.78008	0.641627
Hmga2	ENSMUSG00000056758	down	up	-0.896656	2.89772	0.8435
Serpine2	ENSMUSG00000026249	down	up	-2.39917	1.43277	-0.0428904
Adgrv1	ENSMUSG00000069170	down	up	-2.48285	2.5382	0.895093
St3gal4	ENSMUSG00000032038	down	up	-1.80739	2.07213	0.31759
Synb	ENSMUSG00000047977	down	up	-1.16682	2.83127	1.69562
Kcne3	ENSMUSG00000035165	down	up	-1.14633	2.80874	0.978705
Esr2	ENSMUSG00000021055	down	up	-1.04241	1.74381	0.509118
Rnf19b	ENSMUSG00000028793	down	up	-0.872582	1.18822	-0.403197
Mdfic	ENSMUSG00000041390	down	up	-1.45021	1.12934	0.685183
Slc25a22	ENSMUSG00000019082	down	up	-0.645235	1.07429	0.328733
Slc44a3	ENSMUSG00000039865	down	up	-0.599827	1.4759	0.559271
Enc1	ENSMUSG00000041773	down	up	-0.652492	2.98827	0.707269
